# Supplementary material
Source: PubMed Central journal article supplement (PMC5016064)
Supplement: supp_the2016-0003_Supplemental_Table.pdf [file supp_the2016-0003_Supplemental_Table.pdf]

Supplemental Table for:  
Chromosome 17p Homodisomy Is Associated with Better Outcome in 1p19q Non Codeleted and Idh Mutated Gliomas  
Marianne Labussière et al.

**Table S1:** Primers used for initial amplification

| <b>Exon</b> | <b>Primer forward</b>     | <b>Primer reverse</b>    | <b>Amplicon size</b> |
|-------------|---------------------------|--------------------------|----------------------|
| 2           | tgaagcagccattcttttct      | aattttcgcttcccacaggt     | 334                  |
| 3           | actgtgagtgatccattgga      | atctggacctgggtcttca      | 338                  |
| 4           | ctgctctttcaccatctaca      | attgaagtctcatggaagccag   | 342                  |
| 5           | tgtttctttgctgccgtct       | agtgaggaatcagaggcct      | 337                  |
| 6           | agtcacagcacatgacgg        | cctactgctcacctggag       | 335                  |
| 7           | acaggtctcccaaggcgca       | aaatcggtaagaggtgggccagg  | 272                  |
| 8           | ttctctccacctactgg         | aggcataactgcaccctg       | 335                  |
| 9           | tgtttgtcctgtcctgg         | gaaaacggcattttgagtgttaga | 333                  |
| 10          | ggtacttgaagtgcagtttctacta | agctgcctttgacatgaa       | 343                  |
| 11          | tcatctctcctcctgctt        | tggtatgtcctactccatc      | 328                  |

Supplemental Table for:

Chromosome 17p Homodisomy Is Associated with Better Outcome in 1p19q Non Codeleted and Idh Mutated Gliomas

Marianne Labussière et al.
